1 A de novo genome assembly and annotation of the southern flying squirrel (*Glaucomys volans*)

2

3 J.F. Wolf<sup>\*, †, 1</sup> (<https://orcid.org/0000-0003-0773-4456>), J. Bowman<sup>\*, †</sup> (<https://orcid.org/0000-0002-1892-4469>), S. Keobouasone<sup>‡</sup>, R.S. Taylor<sup>\*</sup> (<https://orcid.org/0000-0002-8916-4858>), P.J.  
4  
5 Wilson<sup>\*\*</sup>

6

7 <sup>\*</sup> Biology Department, Trent University, 1600 West Bank Drive, Peterborough, ON K9J 7B8,  
8 Canada

9 <sup>†</sup> Ontario Ministry of Natural Resources and Forestry, Wildlife Research and Monitoring  
10 Section, Trent University, DNA Building, 1600 West Bank Drive, Peterborough, ON K9J 7B8,  
11 Canada

12 <sup>‡</sup> Landscape Science and Technology Division, Environment and Climate Change Canada, 1125  
13 Colonel By Drive, Ottawa, ON K1S 5R1, Canada

---

<sup>1</sup> Jesse Wolf Ontario Ministry of Natural Resources and Forestry, Wildlife Research and Monitoring Section, Trent University, DNA Building, 1600 West Bank Drive, Peterborough, ON K9J 7B8, Canada

- 14 **Running title:** Southern flying squirrel genome assembly
- 15 **Keywords:** Northern flying squirrel, Southern flying squirrel, *Glaucomys volans*, *Glaucomys*
- 16 *sabrinus*, hybrid zone, introgression, comparative genomics
- 17 **Corresponding author:** Jesse Wolf, Ontario Ministry of Natural Resources and Forestry,
- 18 Wildlife Research and Monitoring Section, Trent University, DNA Building, 1600 West Bank
- 19 Drive, Peterborough, ON K9J 7B8, Canada 647-588-9653 [jessewolf@trentu.ca](mailto:jessewolf@trentu.ca)

20

## ABSTRACT

21 Northern (*Glaucomys sabrinus*) and southern (*Glaucomys volans*) flying squirrels are widespread  
22 species distributed across much of North America. Northern flying squirrels are common  
23 inhabitants of the boreal forest, also occurring in coniferous forest remnants farther south,  
24 whereas the southern flying squirrel range is centered in eastern temperate woodlands. These two  
25 flying squirrel species exhibit a hybrid zone across a latitudinal gradient in an area of recent  
26 secondary contact. *Glaucomys* hybrid offspring are viable and can successfully backcross with  
27 either parental species, however, the fitness implications of such events are currently unknown.  
28 Some populations of *G. sabrinus* are endangered, and thus, interspecific hybridization is a key  
29 conservation concern in flying squirrels. We sequenced and assembled a *de novo* long-read  
30 genome from a *G. volans* individual sampled in southern Ontario, Canada, while four short-read  
31 genomes (2 *G. sabrinus* and 2 *G. volans*, all from Ontario) were re-sequenced on Illumina  
32 platforms. The final genome assembly consisted of approximately 2.40Gb with a scaffold N50 of  
33 455.26Kb. Benchmarking Universal Single-Copy Orthologs reconstructed 3,742 (91.2%)  
34 complete mammalian genes and genome annotation using RNA-seq identified the locations of  
35 19,124 protein-coding genes. The four short-read individuals were aligned to our reference  
36 genome to investigate the demographic history of the two species. A Principal Component  
37 Analysis clearly separated re-sequenced individuals, while inferring population size history using  
38 the Pairwise Sequentially Markovian Coalescent model noted an approximate species split one  
39 million years ago, and a single, possibly recently introgressed individual.

40

## INTRODUCTION

41 Hybridization and introgression can occur between closely related species brought into  
42 secondary contact (Chown *et al.* 2015). Hybridization can be an evolutionary dead end, or it can  
43 lead to adaptive introgression (Arnold and Martin, 2009; Abbott *et al.* 2013). Introgression can  
44 result in the merging of hybridizing forms, reinforcement of reproductive barriers through  
45 selection for assortative mating, and a non-neutral shift in fitness among introgressed individuals.  
46 In some instances, this enables the expansion of the introgressed species into a novel habitat  
47 (Arnold, 1992). Further complicating this, adaptive introgression combined with climate change  
48 can weaken reproductive isolation (Owens & Samuk, 2020). In its extreme form, hybridization  
49 can drive extinction through introgression (Rhymer & Simberloff, 1996).

50 An increase in global surface temperatures has led to range shifts among a variety of taxa on a  
51 global scale (Chen *et al.* 2011) and increasing secondary contact between closely related species  
52 (Krosby *et al.* 2015), leading to increased opportunities for hybridization (Garroway *et al.* 2010;  
53 Chunco, 2014). Climate-driven range expansions have been noted in mammals, insects, and fish  
54 (Moritz *et al.* 2008; Garroway *et al.* 2010; Muhlfeld *et al.* 2014; Scriber, 2014), among other  
55 taxa. Instances of hybridization in wild ecosystems can be exacerbated by climate change  
56 because of increased secondary contact, where barriers to interspecific reproduction are reduced  
57 or removed altogether (Chunco, 2014). Without such barriers, species that were previously  
58 allopatric might interbreed, possibly leading to genetic admixture and potentially outbreeding  
59 depression or heterosis (Barton, 2001; Rius & Darling, 2014).

60 As climate-mediated range expansion has been shown to increase distributional overlap between  
61 related species (Chunco, 2014), climate change will therefore likely drive interspecific  
62 hybridization between many taxa. For example, studies in North America have noted hybrid

63 zones across a latitudinal gradient between southern (*Glaucomys volans*) and northern  
64 (*Glaucomys sabrinus*) flying squirrels (Garroway *et al.* 2010; Rogic *et al.* 2016). Interspecific  
65 hybridization is a key conservation concern for these flying squirrel species, as population  
66 declines among northern flying squirrels have been noted in some areas of the USA, where some  
67 populations are endangered (Wood *et al.* 2016). The potential for introgressive hybridization and  
68 the subsequent ecological and fitness consequences necessitates a holistic assessment of species  
69 biology in the *Glaucomys* hybrid zone. The hybrid zone is a valuable study system to facilitate  
70 the assessment of interspecific hybridization, the potential for reinforcement of reproductive  
71 barriers, and the associated ecological conclusions in a wild, in-vivo system.

72 Low hybrid fitness can also lead to increased divergence between species through reinforcement.  
73 *Glaucomys* hybrid offspring are viable and can successfully backcross with either parental  
74 species (Garroway *et al.* 2010), however, the fitness implications among hybrid or introgressed  
75 individuals is unknown. The purpose of our study was to generate a *de novo* reference genome  
76 for *Glaucomys*. We annotated the reference genome using our already assembled and annotated  
77 flying squirrel transcriptome (Brown *et al.* 2021). Subsequently, using short reads from four  
78 individuals, two northern and two southern flying squirrels, we assembled re-sequenced high  
79 coverage genomes by aligning to the reference genome for a comparative analysis and  
80 demographic history reconstruction.

81

## MATERIALS AND METHODS

### 82 **Sample preparation**

83 We isolated brain tissue from two adult *Glaucomys volans* and two adult *Glaucomys sabrinus* for  
84 sequencing. *G. sabrinus* individuals were collected from near Kawartha Highlands Signature Site  
85 Park (NFS\_6525) and in Algonquin Provincial Park, Ontario, Canada (NFS\_50254), and *G.*  
86 *volans* individuals were sampled near Sherborne Lake (SFS\_25428) and Clear Creek, Ontario,  
87 Canada (SFS\_CC1; Fig. 1). Algonquin Provincial Park (NFS\_50254) was outside the northern  
88 edge of the hybrid zone, and Clear Creek (SFS\_CC1) was outside the range of *G. sabrinus* and  
89 not an area of sympatry. The sites were all mature, closed canopy forest with a mixture of  
90 temperate deciduous trees such as sugar maple (*Acer saccharum*), red oak (*Quercus rubra*),  
91 and American beech (*Fagus grandifolia*), and coniferous trees such as white pine (*Pinus strobus*)  
92 in uplands or white spruce (*Picea glauca*) and balsam fir (*Abies balsamea* in riparian areas (see  
93 Bowman *et al.* 2005 for more details). All four specimens were morphologically identified to  
94 their parental species. Squirrel tissue samples were extracted using an organic extraction. The  
95 extracted DNA was run on a 1.5% agarose gel and Qubit fluorometer using the High Sensitivity  
96 Assay Kit to ensure we had sufficient DNA. They were also run on a Nanodrop ND-8000  
97 spectrophotometer to test purity. The DNA was normalized to 20ng/μl at a final volume of 50μl.

### 98 ***de novo* genome assembly**

99 Southern flying squirrel libraries from individual CC1 were prepared and paired-end sequenced  
100 on 1 lane on an Illumina HiSeq X to generate 150 base pair (bp) paired-end reads. Sequencing  
101 was conducted at The Centre for Applied Genomics (Next Generation Sequencing Facility,  
102 SickKids Hospital, Toronto, Ontario, Canada). The sequence reads from each sample were

103 provided in a FASTQ file format. 10X Genomics long read Chromium sequencing was used to  
104 generate linked reads. The estimated genome size was thought to be near that of the giant flying  
105 squirrel (*Petaurista leucogenys*) genome (C-value = 4.02 pg; Gregory, 2005). We used FastQC  
106 (version 0.11.9; Andrews, 2010) to perform simple quality control checks on raw sequence data  
107 to confirm the quality of the trimmed sequence reads. Long reads were assembled using  
108 Supernova as this assembler uses 10X linked-reads to produce phased assemblies of homologous  
109 chromosomes over multi-megabase ranges (Weisenfeld *et al.* 2018). Supernova recommends  
110 against trimming; however, Supernova was run using all available reads and was performed on  
111 both untrimmed and trimmed reads, to ascertain the impact of trimming on summary statistics.  
112 Trimming was completed using Trimmomatic v0.39 with two different parameter specifications  
113 as follows: 1) Illumina adapters were removed, leading and trailing low quality or N bases were  
114 removed (below quality 3), reads were scanned with a 4-base sliding window and cut when the  
115 average per quality base drops below 15, and reads were dropped that were less than 36 bases  
116 long after the previous steps and 2) Illumina adapters were removed (Bolger *et al.* 2014).  
117 Running Supernova on trimmed reads and parameter set 1) resulted in decreased raw coverage  
118 and Supernova was unable to generate an assembly. Running Supernova on trimmed reads and  
119 parameter set 2) resulted in an assembly with a slightly lower contig and scaffold N50 and thus,  
120 all subsequent analyses used the untrimmed read assembly. The FASTA file representing the  
121 assembly was generated using the pseudohap style output as it was the most contiguous.  
122 Assembly statistics were generated using BMAP 38.90 (Bushnell *et al.* 2017). However,  
123 scaffold N50 values were extremely similar regardless of the style of output that was selected.  
124 We used BUSCO (Benchmarking Universal Single-Copy Orthologs; (Waterhouse *et al.* 2018))  
125 to reconstruct 4,104 conserved mammalian genes to assess genome completeness.

## 126 **Re-sequenced genome assemblies**

127 Northern and southern flying squirrel libraries were prepared and paired-end sequenced across 8  
128 lanes on an Illumina HiSeq X to generate 150 base pair (bp) paired-end reads. Sequencing was  
129 conducted at The Centre for Applied Genomics (Next Generation Sequencing Facility, SickKids  
130 Hospital, Toronto, Ontario, Canada). Forward and reverse reads were concatenated across eight  
131 lanes. FastQC was run as above to determine forward and reverse read quality and inform  
132 subsequent trimming parameters. We trimmed the adapters and low-quality bases from the reads  
133 with Trimmomatic as per the parameter set 1) mentioned above. To avoid any potential  
134 contamination of the genome sequence with viral or bacterial sequences, we screened the  
135 trimmed reads with Kraken2 (Wood *et al.* 2019) using the full standard database.

136 Reads from four individuals (NFS\_6525, NFS\_50254, SFS\_25428, SFS\_CC1) were aligned to  
137 the long read reference genome using Bowtie2 2.2.4 (Langmead & Salzberg, 2012), and the  
138 SAM file converted to a BAM file using Samtools 1.7 (Li *et al.* 2009). We removed poorly  
139 mapped reads via skipping alignments with MAPQ values smaller than 20 using Samtools 1.7.  
140 We removed duplicate reads and added correct read group information to each BAM file using  
141 Picard 2.18.27 (<http://broadinstitute.github.io/picard/>). We then clipped overlapping regions  
142 using clipOverlap from bamUtil 1.0.1.4 (Jun *et al.* 2015) and sorted the BAM file using  
143 Samtools 1.7 and built an index using Picard. All BAM files were checked using FastQC 0.11.9  
144 (Andrews, 2010), and we calculated the mean depth of coverage for each BAM file using  
145 Samtools. We used Haplotype Caller in gatk 3.8 (Mckenna *et al.* 2010) to call variants and  
146 produce a variant call format (VCF) file for each flying squirrel. Individual VCF files were  
147 combined using the Combine GVCFs function, and then, we performed joint genotyping using  
148 Genotype GVCFs, both in GATK, to produce a VCF file with both northern and southern flying



149 squirrels. We did some additional filtering on the combined VCF files to ensure quality. We used  
150 VCFtools 0.1.16 (Danecek *et al.* 2011) to do two rounds of filtering. First, we removed indels  
151 (using the remove-indels command), and any site with a depth of less than five or more than 33  
152 (approximately double the average depth across the genome, using the min-meanDP and max-  
153 meanDP commands) and removed any low-quality genotype calls, with a score below 20, (using  
154 the minGQ command) which in VCFtools are changed to missing data. In the second round, we  
155 filtered to remove genotypes with more than 10% missing data (using the max-missing  
156 command). We did not filter to remove any SNP with a minor allele frequency (MAF) as we  
157 have only one or two individuals from each location and this results in removing the private  
158 sites, instead relying on very high depth and stringent filtering to ensure a high-quality data set.  
159 The combined VCF file used for analyses with all individuals contained 35,937,561 SNPs. After  
160 filtering, we measured the mean depth (using the depth command) and the frequency of missing  
161 data (using the missing-indv command) for each individual in the final VCF file of 2 northern  
162 and 2 southern flying squirrels using VCFtools.

### 163 **Annotation**

164 We identified and classified the repeat regions of the assembled genome using RepeatMasker v.  
165 4.1.0 (Smit *et al.* 2013). We configured RepeatMasker with RMBlast v. 2.10.0 sequence search  
166 engine, Tandem Repeat Finder v. 4.0.9 (Benson, 1999), Dfam\_Consensus database 3.1  
167 (November 2020 release), and used the '-species glaucomys' parameter for the analysis.  
168 We used the gene prediction program AUGUSTUS 2.5.5 (Hoff & Stanke, 2019) to annotate the  
169 masked genome using predictions based on human genes. Additionally, we incorporated RNA-  
170 seq data into AUGUSTUS using the transcriptome created by Brown *et al.* (2021). We used

171 BLAT v. 1.04 to help identify exon structure and allow for the subsequent generation of both  
172 intron and exon hints from alignments for AUGUSTUS (Hoff & Stanke, 2019;  
173 <http://augustus.gobics.de/binaries/readme.rnaseq.html>). The genome run in AUGUSTUS used a  
174 partial gene model allowing the prediction of incomplete genes at the sequence boundaries. The  
175 masked genome was split into 31 parts of ~1995 sequences each to reduce the computational  
176 resources and we concatenated the 31 output General Feature Format (GFF) files into a single  
177 annotation file.

### 178 **Comparative analyses**

179 To compare whole-genome heterozygosity estimates, we used ANGSD to generate a site  
180 frequency spectrum and obtain heterozygosity values for each individual. We used the  
181 parameters -C 50 -ref ref.fa -minQ 20 -minmapq 30 to remove the low-quality bases and reads  
182 (Korneliussen *et al.* 2014). We generated a Principal Component Analysis (PCA) to determine if  
183 northern and southern flying squirrels grouped together or separately. We also ran Pairwise  
184 Sequentially Markovian Coalescent (PSMC; <https://github.com/lh3/psmc>) to model the historical  
185 effective population size and reconstruct the demographic history of both our northern and  
186 southern flying squirrel genomes. We used the default parameters of 64 atomic time intervals (-p  
187 “4+25\*2+4+6”), a generation time of 1.5 years (COSEWIC, 1998), and a mutation rate of  $m =$   
188  $2.0 \times 10^{-9}$  mutations/site/generation (Gossmann *et al.* 2019).

189

## RESULTS AND DISCUSSION

### 190 ***G. volans* genome assembly**

191 The final *Glaucomys volans* genome assembly was the untrimmed linked-read 10X Chromium  
192 assembly with Supernova (Weisenfeld *et al.* 2018), which produced a genome consisting of  
193 7,087 scaffolds  $\geq 50$ Kb with a scaffold N50 of 455.26Kb, a contig N50 of 75.63Kb, a GC content  
194 of 40.48%, and a genome size of 2.40Gb (Table 1; Table 2). These values were slightly more  
195 contiguous relative to a trimmed linked-read 10X Chromium assembly with Supernova (N50 =  
196 450.38Kb, contig N50 = 78.87Kb, genome size = 2.39Gb). BUSCO indicated the presence of  
197 3,742 (91.2%) complete mammalian genes of the 4,104 searched for. Our estimated genome size  
198 was similar to the assembly of the thirteen-lined ground squirrel (*Ictidomys tridecemlineatus*;  
199 ~2.5Gb), whereas the BUSCO value for the ground squirrel was 92.9% (Di Palma *et al.* 2011).  
200 Genome annotation of our final genome incorporating RNA-Seq data identified the locations of  
201 19,124 protein-coding genes compared to 28,262 protein-coding genes without using RNA-Seq  
202 data.

### 203 **Re-sequenced genome assembly**

204 Trimming the concatenated short read pairs resulted in the removal of an average of 4.37% of  
205 reads. The human library was removed from the full standard database, as its inclusion resulted  
206 in a relatively high percentage reads mapped to human due to orthologous mammal genes. After  
207 removing the human library, 0.25-0.35% of the reads were classified as belonging to an  
208 identified bacterial taxon; screening trimmed concatenated short read pairs for bacterial  
209 contaminants resulted in the further removal of an average of 0.29% of reads. The final short  
210 read coverage for each of the four individuals were as follows: SFS\_CC1 = 15.75X, SFS\_25428

211 = 17.55X, NFS\_50254 = 17.88X, NFS\_6525 = 14.96X. Our final VCF file contained 10%  
212 missing data. For all individuals, observed heterozygosity exceeded expected, while inbreeding  
213 coefficients ranged from 0.002610402 – 0.003583892 (NFS\_50254 = 0.002763883, NFS\_6525 =  
214 0.002610402, SFS\_CC1 = 0.003111787, SFS\_25428 = 0.003583892).

### 215 **Comparative analyses and population history of *G. sabrinus* and *G. volans***

216 Northern and southern flying squirrels grouped distinctly in our PCA, while there was more  
217 variation among southern flying squirrels (Fig. 2). The first principal component accounted for  
218 over 80% of the variation noted, and clearly separated both species. Both southern individuals  
219 had higher whole-genome heterozygosity relative to northern individuals. There are multiple  
220 possible explanations for this result. For example, southern flying squirrels are smaller-bodied  
221 and typically exhibit higher population sizes and densities, whereas a lower effective population  
222 size in northern flying squirrels may result in decreased heterozygosity (Arbogast, 2007;  
223 Bowman *et al.* 2020). Overall, the levels of heterozygosity of both flying squirrel species are  
224 comparable to other genome-wide estimates in mammals (see Fig. 3 in Morin *et al.* 2021).

225 Previous research has estimated the split between northern and southern flying squirrels to be in  
226 the early to mid-Pleistocene (2,580,000 to 130,000 years ago; Arbogast, 1999, 2007). Based on  
227 PSMC analysis, the split between the species seemed to occur approximately 1mya, whereas,  
228 after 1mya, the species exhibited different trajectories (Fig. 3). Additionally, it is interesting that  
229 NFS\_6525 had an increase in effective population size more recently, but NFS\_50254 did not  
230 (Fig. 3). Previous work using microsatellites has been consistent with panmixia in Ontario within  
231 each of these species (Garroway *et al.* 2011; Bowman *et al.* 2020). It is possible however, that  
232 long-term introgression is evident in the genome of this northern flying squirrel individual  
233 (NFS\_50254), leading it to group more closely to the southern flying squirrels. Analysis of a

234 larger sample of genomes with varying degrees of introgression will help to clarify these  
235 patterns.

## 236 CONCLUSION

237 High Throughput Sequencing studies on hybrid zones of wild non-model species have revealed  
238 traits associated with divergence in sympatry and allopatry (Scordato *et al.* 2017), patterns of  
239 introgression that differ between populations (Nolte *et al.* 2009), and genes associated with  
240 reproductive isolation (Teeter *et al.* 2008). Whole genome sequencing provides insight into the  
241 evolutionary process of hybridization and adaptive introgression, however, demonstrating the  
242 adaptive or fitness values of introgressed genomic regions remains an area of difficulty (Taylor  
243 & Larson, 2019). Studies of this kind benefit from a reference genome as a basis for identifying  
244 genomic regions of interest, and against which it is possible to evaluate potential hybrids and  
245 introgressed individuals (Payseur & Rieseberg, 2016).

246 As such, we produced a high-quality southern flying squirrel reference genome, an annotation in  
247 gff3 and bed format, and a RepeatMasked version of the genome, as well as high-coverage  
248 northern and southern flying squirrel re-sequenced genomes. The availability of a high-quality  
249 reference genome is invaluable in answering evolutionary questions surrounding hybridization  
250 and introgression and for conservation efforts. This is the first flying squirrel genome generated  
251 and will help future research determine not only the presence of hybrids in the North American  
252 flying squirrel hybrid zone but can also aid in identifying loci of interest in these same  
253 populations.

254

## FIGURES

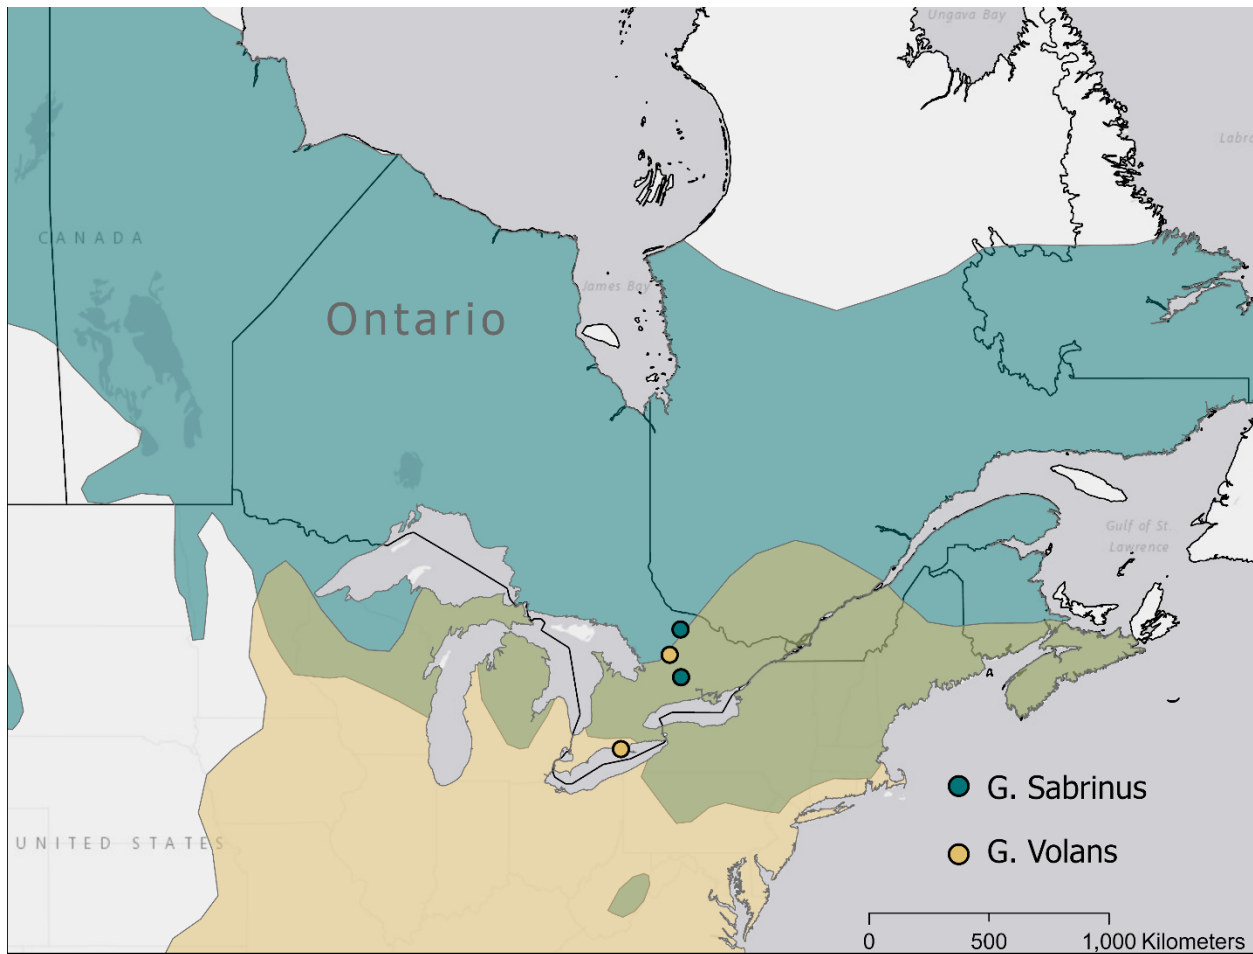

255

256 **Figure 1.** Range of northern (*Glaucomys sabrinus*) and southern (*Glaucomys volans*) flying  
257 squirrels overlaid with sampling locations. The geographic ranges are represented in the same  
258 colors as samples, while the hybrid zone is represented in olive, and only the southernmost *G.*  
259 *volans* sample from Clear Creek, Ontario, is located outside of the hybrid zone.

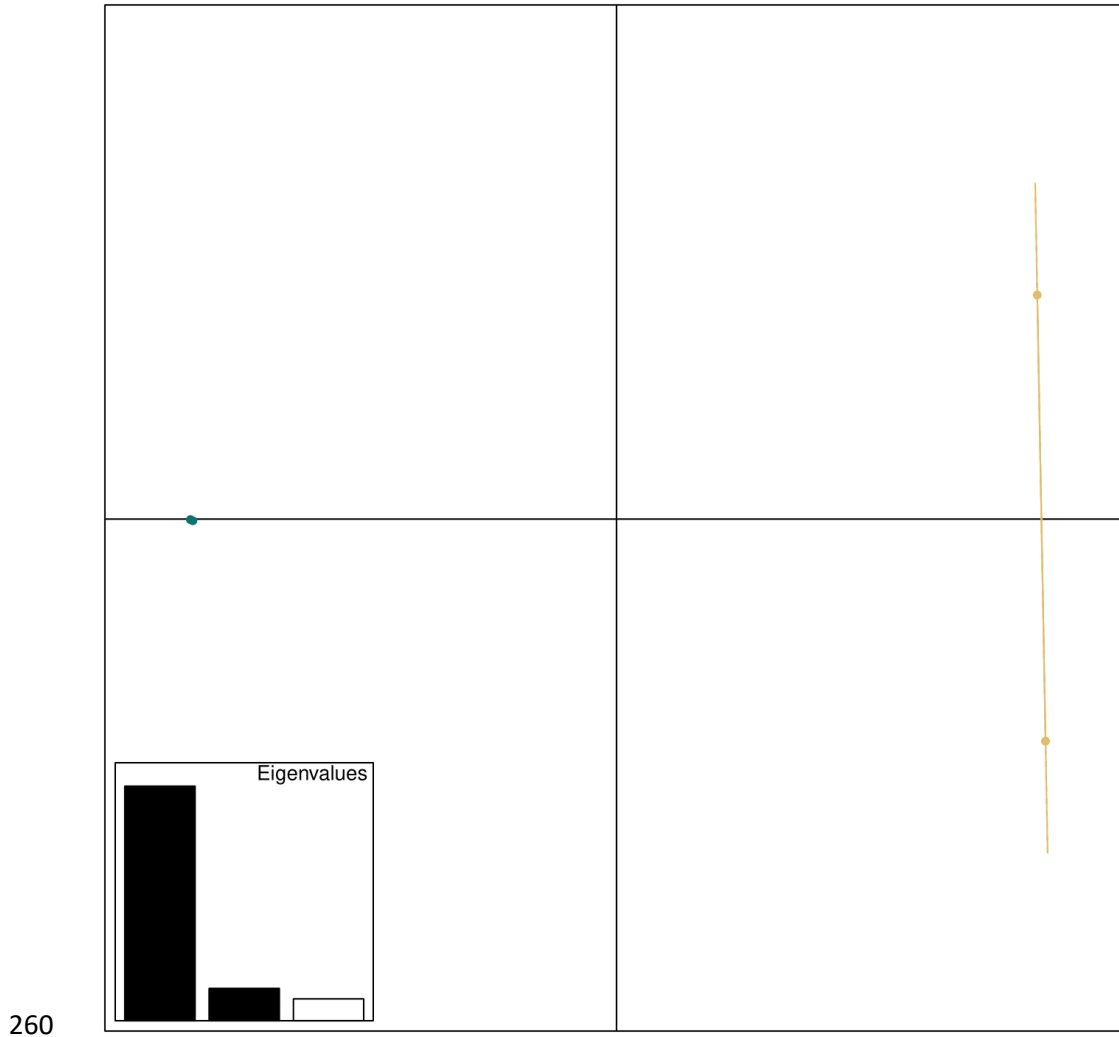

261 **Figure 2.** Principal Component Analysis (PCA) of 2 northern (*Glaucomys sabrinus* –  
262 represented in turquoise) and 2 southern (*Glaucomys volans* – represented in yellow) flying  
263 squirrel genomic variation. PC1 (x-axis) accounts for 81.23% of the variation, while PC2 (y-  
264 axis) accounts for 11.19% of the variation; the first two principal components account for over  
265 90% of the genomic variation.

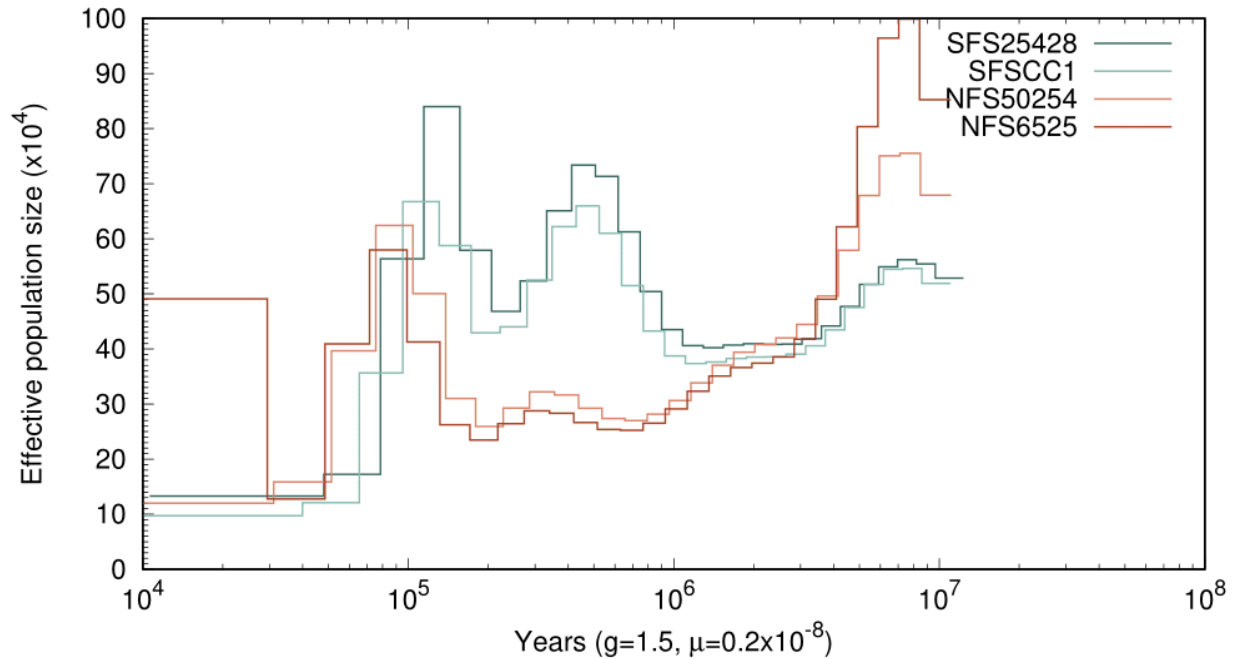

266

267 **Figure 3.** Reconstruction of historical effective population size ( $N_e$ ) of both northern  
268 (*Glacomys sabrinus*) and southern (*Glacomys volans*) flying squirrels using PSMC analysis  
269 assuming a mutation rate  $\mu$  of  $2.0 \times 10^{-9}$  mutations/site/generation and a generation time of 1.5  
270 years.  $N_e$  is in units of 10,000 individuals on the y-axis and time on the x-axis.



271

## TABLES

272 **Table 1.** Summary statistics of the long read *Glaucomys volans* reference genome

| Statistic                    | <i>Glaucomys volans</i> genome |
|------------------------------|--------------------------------|
| Scaffold sequence total (bp) | 2.58 x 10 <sup>9</sup>         |
| Number of scaffolds          | 61,815                         |
| Scaffold N50 (bp)            | 455,262                        |
| Scaffold L50                 | 1,582                          |
| Scaffold N90 (bp)            | 117,214                        |
| Scaffold L90                 | 5,080                          |
| Contig sequence total (bp)   | 2.53 x 10 <sup>9</sup>         |
| Number of contigs            | 115,069                        |
| Contig N50 (bp)              | 75,631                         |
| Contig L50                   | 9,446                          |
| Contig N90 (bp)              | 21,155                         |
| Contig L90                   | 30,374                         |

273

274 **Table 2.** Nucleotide base composition of the long read *Glaucomys volans* reference genome

| A      | C      | T      | G      | N     |
|--------|--------|--------|--------|-------|
| 29.77% | 20.24% | 29.75% | 20.24% | 0.17% |

275

276

## **DATA AVAILABILITY**

277 10X Chromium long-read and Illumina short read data as well as a FASTA file of the assembly  
278 are available at the National Centre for Biotechnology Information (NCBI), under the BioProject  
279 accession number PRJNA723586. The Whole Genome Assembly has been deposited at NCBI  
280 under the BioProject accession number PRJNA723289; BioSample number SAMN18810840.

281

## ACKNOWLEDGEMENTS

282 This research was supported by NSERC Discovery Grants to JB and PJW, and by the Ontario  
283 Ministry of Natural Resources and Forestry. The authors would like to thank: Michael G.C.  
284 Brown for assistance with sampling. Bridget Redquest and Austin Thompson for DNA  
285 extractions, and Kathleen Lo for their comments on earlier drafts of the manuscript.

286  
287  
288  
289  
290  
291  
292  
293  
294  
295  
296  
297  
298  
299  
300  
301  
302  
303  
304  
305  
306  
307  
308

## LITERATURE CITED

Abbott, R., D. Albach, S. Ansell, J. W. Arntzen, S. J. E. Baird *et al.* 2013 Hybridization and speciation. *J. Evol. Biol.* 26: 229–246.

Andrews, S. 2010. FastQC: a quality control tool for high throughput sequence data. Available online at: <http://www.bioinformatics.babraham.ac.uk/projects/fastqc>

Arbogast, B. S., 2007 A brief history of the new world flying squirrels: Phylogeny, biogeography, and conservation genetics. *J. Mammal.* 88: 840–849.

Arbogast, B. S., 1999 Mitochondrial DNA phylogeography of the new world flying squirrels (*Glaucomys*): Implications for pleistocene biogeography. *J. Mammal.* 80: 142–155.

Arnold, M. L., 1992 Natural hybridization as an evolutionary process. *Annu. Rev. Ecol. Syst.* 23: 237–261.

Arnold, M. L., and N. H. Martin, 2009 Adaptation by introgression. *J. Biol.* 8: 9–11.

Barton, N. H., 2001 The role of hybridization in evolution. *Mol. Ecol.* 10: 551–568.

Bolger, A. M., M. Lohse, and B. Usadel, 2014 Trimmomatic: A flexible trimmer for Illumina sequence data. *Bioinformatics* 30: 2114–2120.

Bowman, J., P. O’Brien, and P. J. Wilson, 2020 Landscape genetics of flying squirrels in Ontario.

Bowman, J., G. L. Holloway, J. R. Malcolm, K. R. Middel, and P. J. Wilson. 2005 Northern range boundary dynamics of southern flying squirrels: evidence of an energetic bottleneck. *Can. J. Zool.* 83: 1486-1494.

Brown, M. G. C., J. Bowman, and P. J. Wilson, 2021 Novel de novo transcriptome assembly, functional annotation, and SNP discovery in North American flying squirrels (genus *Glaucomys*).

- 309 Bushnell, B., J. Rood, and E. Singer, 2017 BBMerge – Accurate paired shotgun read merging via  
310 overlap. PLoS One 12: 1–15.
- 311 Chen, I. C., J. K. Hill, R. Ohlemüller, D. B. Roy, and C. D. Thomas, 2011 Rapid range shifts of  
312 species associated with high levels of climate warming. Science (80-. ). 333: 1024–1026.
- 313 Chown, S. L., K. A. Hodgins, P. C. Griffin, J. G. Oakeshott, M. Byrne *et al.* 2015 Biological  
314 invasions, climate change and genomics. Evol. Appl. 8: 23–46.
- 315 Chunco, A. J., 2014 Hybridization in a warmer world. Ecol. Evol. 4: 2019–2031.
- 316 COSEWIC. 1998. Southern flying squirrel (*Glaucomys volans*) COSEWIC assessment and status  
317 report. Available from: [https://www.canada.ca/en/environment-climate-](https://www.canada.ca/en/environment-climate-change/services/species-risk-public-registry/cosewic-assessments-status-reports/southern-flying-squirrel/chapter-2.html)  
318 [change/services/species-risk-public-registry/cosewic-assessments-status-reports/southern-](https://www.canada.ca/en/environment-climate-change/services/species-risk-public-registry/cosewic-assessments-status-reports/southern-flying-squirrel/chapter-2.html)  
319 [flying-squirrel/chapter-2.html](https://www.canada.ca/en/environment-climate-change/services/species-risk-public-registry/cosewic-assessments-status-reports/southern-flying-squirrel/chapter-2.html)
- 320 Danecek, P., A. Auton, G. Abecasis, C. A. Albers, E. Banks *et al.* 2011 The variant call format  
321 and VCFtools. 27: 2156–2158.
- 322 Di Palma F, et al. 2011. The draft genome of *Spermophilus decemlineatus*. GenBank  
323 GCA\_000236235.1 Garroway, C. J., J. Bowman, T. J. Cascaden, G. L. Holloway, C. G.  
324 Mahan *et al.* 2010 Climate change induced hybridization in flying squirrels. Glob. Chang.  
325 Biol. 16: 113–121.
- 326 Garroway, C. J., J. Bowman, G. L. Holloway, J. R. Malcolm, and P. J. Wilson. 2011 The genetic  
327 signature of rapid range expansion by flying squirrels in response to contemporary climate  
328 warming. Global Change Biol. 17: 1760-1769.
- 329 Garroway, C. J., J. Bowman, T. J. Cascaden, G. L. Holloway, C. G. Mahan, J. R. Malcolm, M.  
330 A. Steele, G. Turner, and P. J. Wilson. 2010 Climate change induced hybridization in flying  
331 squirrels. Global Change Biol. 16: 113-121.

- 332 Gossmann, T. I., A. Shanmugasundram, S. Börno, L. Duvaux, C. Lemaire *et al.* 2019 Ice-Age  
333 Climate Adaptations Trap the Alpine Marmot in a State of Low Genetic Diversity. *Curr.*  
334 *Biol.* 29: 1712-1720.e7.
- 335 Gregory, T.R. 2020. Animal Genome Size Database. <http://www.genomesize.com>.
- 336 Hoff, K. J., and M. Stanke, 2019 Predicting Genes in Single Genomes with AUGUSTUS. *Curr.*  
337 *Protoc. Bioinforma.* 65: 1–54.
- 338 Jun, G., M. K. Wing, G. R. Abecasis, and H. M. Kang, 2015 An efficient and scalable analysis  
339 framework for variant extraction and refinement from population scale DNA sequence data.  
340 *Genome Res.* gr-176552:
- 341 Korneliussen, T.S., Albrechtsen, A. & Nielsen, R. ANGSD: Analysis of Next Generation  
342 Sequencing Data. *BMC Bioinformatics* 15, 356 (2014). [https://doi.org/10.1186/s12859-014-](https://doi.org/10.1186/s12859-014-0356-4)  
343 [0356-4](https://doi.org/10.1186/s12859-014-0356-4)
- 344 Krosby, M., C. B. Wilsey, J. L. McGuire, J. M. Duggan, T. M. Nogeire *et al.* 2015 Climate-  
345 induced range overlap among closely related species. *Nat. Clim. Chang.* 5: 883–886.
- 346 Langmead, B., and S. L. Salzberg, 2012 Fast gapped-read alignment with Bowtie 2. *9*: 357–360.
- 347 Li, H., B. Handsaker, A. Wysoker, T. Fennell, J. Ruan *et al.* 2009 The Sequence Alignment /  
348 Map format and SAMtools. *25*: 2078–2079.
- 349 Mckenna, A., M. Hanna, E. Banks, A. Sivachenko, K. Cibulskis *et al.* 2010 The Genome  
350 Analysis Toolkit : A MapReduce framework for analyzing next-generation DNA  
351 sequencing data. 1297–1303.
- 352 Morin, P. A., F. I. Archer, C. D. Avila, J. R. Balacco, Y. V. Bukhman *et al.*,. Reference genome  
353 and demographic history of the most endangered marine mammal, the vaquita. *Mol. Ecol.*  
354 *Resour.* 21: 1008-1020.

- 355 Moritz, C., J. L. Patton, C. J. Conroy, J. L. Parra, G. C. White *et al.* 2008 Impact of a century of  
356 climate change on small-mammal communities in Yosemite National Park, USA. *Science*  
357 (80- ). 322: 261–264.
- 358 Muhlfeld, C. C., R. P. Kovach, L. A. Jones, R. Al-Chokhachy, M. C. Boyer *et al.* 2014 Invasive  
359 hybridization in a threatened species is accelerated by climate change. *Nat. Clim. Chang.* 4:  
360 620–624.
- 361 Nolte, A. W., Z. Gompert, and C. A. Buerkle, 2009 Variable patterns of introgression in two  
362 sculpin hybrid zones suggest that genomic isolation differs among populations. *Mol. Ecol.*  
363 18: 2615–2627.
- 364 Owens, G. L., and K. Samuk, 2020 Adaptive introgression during environmental change can  
365 weaken reproductive isolation. *Nat. Clim. Chang.* 10: 58–62.
- 366 Payseur, B., and L. Rieseberg, 2016 A genomic perspective on hybridization and speciation *Bret.*  
367 *Mol. Ecol.* 25: 2337–2360.
- 368 Rhymer, J. M., and D. Simberloff, 1996 Extinction by hybridization and introgression. *Annu.*  
369 *Rev. Ecol. Syst.* 27: 83–109.
- 370 Rius, M., and J. A. Darling, 2014 How important is intraspecific genetic admixture to the success  
371 of colonising populations? *Trends Ecol. Evol.* 29: 233–242.
- 372 Rogic, A., G. Dubois, N. Tessier, P. Paré, P. Canac-Marquis *et al.* 2016 Applying genetic  
373 methods to identify northern and southern flying squirrels and determine conservation  
374 needs. *Conserv. Genet. Resour.* 8: 471–480.
- 375 Scordato, E. S. C., M. R. Wilkins, G. Semenov, A. S. Rubtsov, N. C. Kane *et al.* 2017 Genomic  
376 variation across two barn swallow hybrid zones reveals traits associated with divergence in  
377 sympatry and allopatry. *Mol. Ecol.* 26: 5676–5691.

- 378 Scriber, J. M., 2014 *Climate-driven reshuffling of species and genes: Potential conservation*  
379 *roles for species translocations and recombinant hybrid genotypes.*
- 380 Taylor, S. A., and E. L. Larson, 2019 Insights from genomes into the evolutionary importance  
381 and prevalence of hybridization in nature. *Nat. Ecol. Evol.* 3: 170–177.
- 382 Teeter, K. C., B. A. Payseur, L. W. Harris, M. A. Bakewell, L. M. Thibodeau *et al.* 2008  
383 Genome-wide patterns of gene flow across a house mouse hybrid zone. *Genome Res.* 18:  
384 67–76.
- 385 Waterhouse, R. M., M. Seppey, F. A. Simao, M. Manni, P. Ioannidis *et al.* 2018 BUSCO  
386 applications from quality assessments to gene prediction and phylogenomics. *Mol. Biol.*  
387 *Evol.* 35: 543–548.
- 388 Weisenfeld, N. I., V. Kumar, P. Shah, D. M. Church, and D. B. Jaffe, 2018 Direct determination  
389 of diploid genome sequences. *Genome Res.* 28: 757–767.
- 390 Wood, D. E., Lu, Jennifer, and B. Langmead, 2019 Improved metagenomic analysis with Kraken  
391 2. bioRxiv 1–13.
- 392 Wood, C. M., J. W. Witham, and M. L. Hunter, 2016 Climate-driven range shifts are stochastic  
393 processes at a local level: Two flying squirrel species in Maine. *Ecosphere* 7: 1–9.  
394
